# Supplementary material
Source: Research Square preprint supplement (doi:10.21203/rs.3.rs-9472844/v1)
Supplement: Supplementary file 1 [file 3068adcf6dce7d85d807100f.docx]

**Highlights**

**·** A four-party evolutionary game models carbon trust dynamics in supply chains.

**·** Trust repair functions as a costly signal to bridge the carbon trust deficit.

**·** Strategic regulatory retrenchment enables an autonomous governance regime.

**·** Market reputation effectively substitutes for administrative penalties.
