# Supplementary material
Source: Research Square preprint supplement (doi:10.21203/rs.3.rs-9472844/v1)
Supplement: Supplementary file 2 [file d79915b108ecc8e9a6fb73bb.docx]

**From Coercion to Autonomy: Mechanisms for Carbon Trust Repair in Multi-tier Supply Chains**

**Declaration of Conflicting Interests**

The author(s) declared no potential conflicts of interest with respect to the research, authorship, and/or publication of this article.

**Funding** No
